# Supplementary material for: Sex Differences Associated with Weekend Catch-Up Sleep and Waist-to-Height-Ratio among South Korean Adults Using Korea National Health and Nutrition Examination Survey 2016–2021 Data
Source: MDPI journal article supplement (doi:10.3390/healthcare11212889), 2023-11-02
Supplement: s1 [file s1]

Table S1. General characteristics of study population according to CUS

| Variable               | WHtR(waist-to-height-ratio) |      |                |      |       |      | P-value | WHtR(waist-to-height-ratio) |      |                |      |       |      | P-value |
|------------------------|-----------------------------|------|----------------|------|-------|------|---------|-----------------------------|------|----------------|------|-------|------|---------|
|                        | Male                        |      |                |      |       |      |         | Female                      |      |                |      |       |      |         |
|                        |                             |      |                |      |       |      |         |                             |      |                |      |       |      |         |
|                        | <0.5 (Normal)               |      | ≥0.5 (Obesity) |      | Total |      |         | <0.5 (Normal)               |      | ≥0.5 (Obesity) |      | Total |      |         |
| N                      | %                           | N    | %              | N    | %     | N    | %       | N                           | %    | N              | %    | N     | %    |         |
| Weekend-Catch up-Sleep |                             |      |                |      |       |      | <.0001  |                             |      |                |      |       |      | <.0001  |
| CUS ≤0                 | 644                         | 34.6 | 1218           | 65.4 | 1862  | 51.3 |         | 610                         | 37.8 | 1004           | 62.2 | 1614  | 51.1 |         |
| 0<CUS<1                | 256                         | 4.7  | 373            | 59.3 | 629   | 17.3 |         | 319                         | 54.0 | 272            | 46.0 | 591   | 18.7 |         |
| 1≤CUS<2                | 313                         | 43.9 | 400            | 56.1 | 713   | 19.6 |         | 339                         | 58.9 | 237            | 41.2 | 576   | 18.3 |         |
| CUS≥2                  | 189                         | 44.1 | 240            | 55.9 | 429   | 11.8 |         | 232                         | 61.7 | 144            | 38.3 | 376   | 11.9 |         |
| Age                    |                             |      |                |      |       |      | <.0001  |                             |      |                |      |       |      | <.0001  |
| 19-39                  | 486                         | 52.0 | 449            | 48.0 | 935   | 25.7 |         | 515                         | 78.0 | 145            | 22.0 | 660   | 20.9 |         |
| 40-65                  | 817                         | 35.8 | 1468           | 64.3 | 2285  | 62.9 |         | 916                         | 46.0 | 1076           | 54.0 | 1992  | 63.1 |         |
| >65                    | 99                          | 24.0 | 314            | 76.0 | 413   | 11.4 |         | 69                          | 13.7 | 436            | 86.3 | 505   | 16.0 |         |
| Martial Status         |                             |      |                |      |       |      | <.0001  |                             |      |                |      |       |      | <.0001  |
| Married                | 1077                        | 35.6 | 1945           | 64.4 | 3022  | 83.2 |         | 1148                        | 42.4 | 1559           | 57.6 | 2707  | 85.8 |         |
| UnMarried              | 325                         | 53.2 | 286            | 46.8 | 611   | 16.8 |         | 352                         | 78.2 | 98             | 21.8 | 450   | 14.3 |         |
| House income           |                             |      |                |      |       |      | 0.0288  |                             |      |                |      |       |      | <.0001  |
| Low                    | 89                          | 33.1 | 180            | 66.9 | 269   | 7.4  |         | 101                         | 22.6 | 346            | 77.4 | 447   | 14.2 |         |
| Mid-low                | 289                         | 35.9 | 516            | 64.1 | 805   | 22.2 |         | 268                         | 38.2 | 433            | 61.8 | 701   | 22.2 |         |
| Mid-high               | 458                         | 41.1 | 657            | 58.9 | 1115  | 30.7 |         | 483                         | 52.1 | 444            | 47.9 | 927   | 29.4 |         |
| High                   | 565                         | 39.2 | 876            | 60.8 | 1441  | 39.7 |         | 345                         | 59.9 | 432            | 40.1 | 1077  | 34.2 |         |
| Missing                | 3                           |      |                |      |       |      |         | 5                           |      |                |      |       |      |         |

|                            |      |      |      |      |      |      |        |      |      |      |        |      |        |
|----------------------------|------|------|------|------|------|------|--------|------|------|------|--------|------|--------|
| Education level            |      |      |      |      |      |      | <.0001 |      |      |      |        |      | <.0001 |
| Elementary school or below | 77   | 26.1 | 218  | 73.9 | 295  | 8.1  |        | 98   | 15.4 | 539  | 84.6   | 637  | 20.2   |
| Middle school              | 101  | 32.0 | 215  | 68.0 | 316  | 8.7  |        | 91   | 30.7 | 205  | 69.3   | 296  | 9.4    |
| High school                | 424  | 38.3 | 682  | 61.7 | 1106 | 30.4 |        | 533  | 50.5 | 522  | 49.5   | 1055 | 33.4   |
| College or above           | 800  | 41.8 | 1116 | 58.3 | 1916 | 52.7 |        | 778  | 66.6 | 390  | 33.4   | 1168 | 37.0   |
| Missing                    |      |      |      |      |      |      |        | 1    |      |      |        |      |        |
| Region                     |      |      |      |      |      |      | <.0001 |      |      |      |        |      | <.0001 |
| Urban area                 | 1183 | 40.2 | 1760 | 59.8 | 2943 | 81.0 |        | 1285 | 51.0 | 1236 | 4903.0 | 2521 | 79.9   |
| Rural area                 | 219  | 31.7 | 471  | 68.3 | 690  | 19.0 |        | 215  | 33.8 | 421  | 66.2   | 636  | 20.2   |
| Occupation                 |      |      |      |      |      |      | 0.1351 |      |      |      |        |      | <.0001 |
| White collar               | 668  | 40.2 | 995  | 59.8 | 1663 | 46.0 |        | 822  | 66.8 | 408  | 33.2   | 1230 | 39.0   |
| Pink collar                | 281  | 37.9 | 461  | 62.1 | 742  | 20.5 |        | 564  | 35.9 | 1008 | 64.1   | 1572 | 49.8   |
| Blue collar                | 442  | 36.6 | 767  | 63.4 | 1209 | 33.5 |        | 112  | 31.8 | 240  | 68.2   | 352  | 11.2   |
| Missing                    | 19   |      |      |      |      |      |        | 3    |      |      |        |      |        |
| Smoking status             |      |      |      |      |      |      | <.0001 |      |      |      |        |      | 0.102  |
| Non-smoker                 | 368  | 43.2 | 483  | 56.8 | 851  | 23.5 |        | 1310 | 46.9 | 1482 | 53.1   | 2792 | 88.6   |
| Ex-smoker                  | 505  | 33.6 | 999  | 66.4 | 1504 | 41.4 |        | 93   | 57.7 | 87   | 48.3   | 180  | 5.7    |
| Current-smoker             | 529  | 41.5 | 745  | 58.5 | 1274 | 35.1 |        | 97   | 53.9 | 83   | 46.1   | 180  | 5.7    |
| Missing                    | 4    |      |      |      |      |      |        | 5    |      |      |        |      |        |
| Alcohol consumption        |      |      |      |      |      |      | <.0001 |      |      |      |        |      | <.0001 |
| None                       | 178  | 33.5 | 354  | 66.5 | 532  | 14.7 |        | 353  | 36.0 | 627  | 64.0   | 980  | 31.1   |
| ≤1 time per week           | 739  | 42.9 | 984  | 57.1 | 1723 | 47.5 |        | 943  | 52.7 | 845  | 47.3   | 1788 | 56.7   |
| ≥2 time per week           | 485  | 35.3 | 890  | 64.7 | 1375 | 37.9 |        | 204  | 53.1 | 180  | 46.9   | 384  | 12.2   |
| Missing                    | 3    |      |      |      |      |      |        | 5    |      |      |        |      |        |
| Physical activity          |      |      |      |      |      |      | <.0001 |      |      |      |        |      | <.0001 |
| No                         | 669  | 35.4 | 1223 | 64.6 | 1892 | 52.1 |        | 790  | 44.0 | 1007 | 56.0   | 1797 | 57.1   |

|         |      |      |      |      |      |       |      |      |      |      |      |       |
|---------|------|------|------|------|------|-------|------|------|------|------|------|-------|
| Yes     | 732  | 42.1 | 1007 | 57.9 | 1739 | 47.9  | 708  | 52.3 | 645  | 47.7 | 1353 | 43.0  |
| Missing | 2    |      |      |      |      |       | 7    |      |      |      |      |       |
| Total   | 1402 | 38.6 | 2231 | 61.4 | 3633 | 100.0 | 1500 | 47.5 | 1657 | 52.5 | 3157 | 100.0 |
